# Supplementary material for: Serological Evidence That SARS-CoV-2 Has Not Emerged in Deer in Germany or Austria during the COVID-19 Pandemic
Source: MDPI journal article supplement (doi:10.3390/microorganisms10040748), 2022-03-30
Supplement: s1 [file s1]

|                                      | 10               | 20         | 30              | 40                  | 50                         |
|--------------------------------------|------------------|------------|-----------------|---------------------|----------------------------|
| <i>Odocoileus virginianus</i> (*)    | MTGSFWLLLS       | LVAVTAAQST | TEEQAKTFLE      | KFNHEAEDLS          | YQSSLASWNY                 |
| <i>Capreolus Capreolus</i>           | .....~.....      | .....      | .....           | .....               | .....                      |
| <i>Cervus elaphus</i>                | .....            | .....      | N.....          | .....               | .....                      |
| <i>Muntiacus muntjak</i>             | .....            | .....      | .....           | .....               | .....                      |
| <i>Oryx dammah</i> (*)               | .....            | .....      | G.....          | .....               | .....                      |
| <i>Nanger dama</i> (*)               | -----            | -----      | -----           | -----               | -----                      |
| <i>Bubalus bubalis</i> (*)           | .....S-          | .....      | .....           | .....               | .....                      |
| <i>Bos taurus</i> (*)                | .....            | .....      | .....           | .....               | .....                      |
| <i>Balaenoptera musculus</i> (*)     | .S.....          | .....      | .....Q.....     | D.....              | .....                      |
| <i>Tursiops truncatus</i> (*)        | .S.....          | A.....     | R.....          | Q.....              | DR.....                    |
| <i>Sus scrofa</i> (.)                | .S.....          | IP.....    | .....L.....     | .....L.....         | .....A.....                |
| <i>Manis pentadactyla</i> (*)        | .S..S.....       | .....      | SD.....         | E.....              | S.....E.....               |
| <i>Felis catus</i> (*)               | .S.....          | FA.L.....  | .....L.....     | .....               | .....E.....                |
| <i>Mustela putorius</i>              | .L..S.....       | A.L.....   | .....DL.....    | .....Y.....         | .....E.....N.....          |
| <i>Neogale vison</i>                 | .L..S.....       | A.L.....   | .....DL.....    | .....Y.....         | .....E.....N.....          |
| <i>Canis lupus</i> (.)               | .S..S.....       | A.L.....   | -.....DLV.....  | .....Y.....         | .....E.....                |
| <i>Nyctereutes procyonoides</i> (*)  | .S..S.....       | A.L.....   | -.....DLVN..... | .....Y.....         | .....E.....                |
| <i>Rhinolophus ferrumequinum</i>     | .S..S.....       | .....      | .....DL.....    | K.....D.....D.....  | S.....N.....H.....E.....   |
| <i>Rousettus aegyptiacus</i>         | .S.....F.....    | .....      | P.....L.....    | .....T.....         | .....F.....DF.....         |
| <i>Homo sapiens</i> (*)              | .SS.S.....       | .....      | I.....          | D.....              | .....F.....                |
| <i>Ptilocolobus tephrosceles</i> (*) | .S..S.....F..... | .....      | I.....          | D.....              | .....F.....                |
| <i>Macaca mulatta</i> (*)            | .S..S.....       | .....      | I.....          | D.....              | .....F.....                |
| <i>Macaca nemestrina</i> (*)         | .S..S.....       | .....      | I.....          | D.....              | .....F.....                |
| <i>Choloepus didactylus</i>          | .S..S.....       | F.....     | -.....L.....    | D.....T.....        | QQ.....H.....HA.....D..... |
| <i>Anas platyrhynchos</i>            | .LAHVL..CG       | .ST.VVP..D | VTN.....M.....  | A.....E.....VR..... | IN.....EN.....D.....       |
| <i>Gallus gallus</i>                 | .LLH....CG       | .S..VTP..D | VTQE.Q.....     | A.....E.....VR..... | I.....EN.....              |

|                                      | 60              | 70             | 80            | 90             | 100              |
|--------------------------------------|-----------------|----------------|---------------|----------------|------------------|
| <i>Odocoileus virginianus</i> (*)    | NTNITDENVQ      | KMNEARAKWS     | AFYEEQSFMA    | KTYSLLEEIQN    | LTLKRQLKAL       |
| <i>Capreolus Capreolus</i>           | .....           | .....          | .....         | .....          | .....            |
| <i>Cervus elaphus</i>                | .....           | .....          | .....         | .....          | .....            |
| <i>Muntiacus muntjak</i>             | .....           | .....          | .....         | .....          | F.....           |
| <i>Oryx dammah</i> (*)               | .....           | .....          | .....         | R.....         | .....            |
| <i>Nanger dama</i> (*)               | .....           | .....          | .....         | .....          | .....            |
| <i>Bubalus bubalis</i> (*)           | .....           | .....          | .....         | .....          | .....            |
| <i>Bos taurus</i> (*)                | .....           | .....          | .....         | .....          | .....            |
| <i>Balaenoptera musculus</i> (*)     | .....           | A.....         | I.....        | P.....         | Q.....           |
| <i>Tursiops truncatus</i> (*)        | .....           | A.G.....       | I.....        | P.....R.....   | QV.....          |
| <i>Sus scrofa</i> (.)                | .....I.....     | D.....         | I.....        | P.D.....T..... | I.....Q.....     |
| <i>Manis pentadactyla</i> (*)        | .....           | V.G.....       | T.....KI..... | N.Q.QN.....    | D.I.....Q.....   |
| <i>Felis catus</i> (*)               | .....           | G.....         | KL.....       | P.A.H.....     | T.V.....Q.....   |
| <i>Mustela putorius</i>              | .....I.....     | I.G.....       | E.QH.....     | P.....D.....   | PII.....R.....   |
| <i>Neogale vison</i>                 | .....I.....     | I.G.....       | E.QH.....     | P.....D.....   | PII.....R.....   |
| <i>Canis lupus</i> (.)               | I.....          | N.G.....       | KL.....       | P.....D.....   | S.V.....R.....   |
| <i>Nyctereutes procyonoides</i> (*)  | .....L.....     | N.G.....       | KL.....       | P.....D.....   | S.V.....R.....   |
| <i>Rhinolophus ferrumequinum</i>     | S.....          | D.G.....       | D.KK.KL.....  | NF.....H.....  | D.V.L.QI.....    |
| <i>Rousettus aegyptiacus</i>         | I.....          | SK.....T.....  | KL.....       | Q.D.....D..... | PE.L.RI.....     |
| <i>Homo sapiens</i> (*)              | E.....          | N.N.GD.....    | LK.TL.....    | QM.P.Q.....    | V.L.Q.....       |
| <i>Ptilocolobus tephrosceles</i> (*) | E.A.N.N.GE..... | LK.TL.....     | QM.P.Q.....   | V.L.Q.....     | V.L.Q.....       |
| <i>Macaca mulatta</i> (*)            | E.....          | N.N.GE.....    | LK.TL.....    | QM.P.Q.....    | V.L.Q.....       |
| <i>Macaca nemestrina</i> (*)         | E.....          | N.N.GE.....    | LK.TL.....    | QM.P.Q.....    | V.L.Q.....       |
| <i>Choloepus didactylus</i>          | .....AL.....    | G.R.....       | KL.....       | FP.Q.S.....    | N.V.L.Q.....     |
| <i>Anas platyrhynchos</i>            | E.TAT.....      | G.....         | A.N.....      | SNFP.SD.....   | D.PL.RL.IQS..... |
| <i>Gallus gallus</i>                 | E.TAR.....      | S.G.....A..... | A.N.....      | SFP.AN.....    | D.AVTRL.IQS..... |

|                                      | 110                   | 120        | 130        | 140        | 150           |
|--------------------------------------|-----------------------|------------|------------|------------|---------------|
| <i>Odocoileus virginianus</i> (*)    | QQSGTSLVLSA           | EKSKRLNTIL | NTMSTIYSTG | KVLDPN-TQE | CLALEPGLDD    |
| <i>Capreolus Capreolus</i>           | .....XX XXXXX.        | .....      | .....      | .....-     | .....         |
| <i>Cervus elaphus</i>                | .....                 | .....      | .....      | .....-     | .....         |
| <i>Muntiacus muntjak</i>             | .....                 | .....      | .....      | .....-     | .....         |
| <i>Oryx dammah</i> (*)               | .H.....T              | .....      | .K.....    | .....-     | .....         |
| <i>Nanger dama</i> (*)               | -----                 | -----      | -----      | -----      | -----         |
| <i>Bubalus bubalis</i> (*)           | .H...A... ..Q...      | .K.....    | .....-     | .....      | .....         |
| <i>Bos taurus</i> (*)                | .H...A... ..Q...      | .K.....    | .....-     | .....      | .....         |
| <i>Balaenoptera musculus</i> (*)     | .....                 | D.....     | .....S     | .....-     | Y.V.....      |
| <i>Tursiops truncatus</i> (*)        | .....                 | D.....A..  | S.....S    | .....-     | S.V.....      |
| <i>Sus scrofa</i> (.)                | .....G..              | D.....     | .....S     | .....NP    | .....V.....E  |
| <i>Manis pentadactyla</i> (*)        | .L..S.A... D.NQ...    | .....      | .....      | .CN.GNP    | .SL.....N     |
| <i>Felis catus</i> (*)               | .....S.....           | D..Q.....  | .A.....    | .ACN.NP    | .....L.....   |
| <i>Mustela putorius</i>              | .....S.....           | D.RE.....  | .A.....    | .ACN.NP    | .....L.....   |
| <i>Neogale vison</i>                 | .....S.....           | D.RE.....  | .A.....    | .ACN.NP    | .....L.....   |
| <i>Canis lupus</i> (.)               | .H..S.....            | D.NQ.....  | .S..V....  | .ACN.SNP   | .....L.....   |
| <i>Nyctereutes procyonoides</i> (*)  | .H..S.....            | D.NQ.....  | .S.....    | .ACN.SNP   | .....L.....   |
| <i>Rhinolophus ferrumequinum</i>     | .....SP...E D.....S.. | .A.....    | .....      | .CK.NP     | .....L.....N  |
| <i>Rousettus aegyptiacus</i>         | .....S.T... D.T...D.. | .....      | .....      | .ICQ.NS    | .....L.....   |
| <i>Homo sapiens</i> (*)              | ..N.S...E D.....      | .....      | .....      | .CN.DNP    | .....L.....NE |
| <i>Ptilocolobus tephrosceles</i> (*) | ..N.S...E D.....      | .....      | .....      | .CN.NP     | .....L.D...NE |
| <i>Macaca mulatta</i> (*)            | ..N.S...E D.....      | .....      | .....      | .CN.NP     | .....L.D...NE |
| <i>Macaca nemestrina</i> (*)         | ..N.S...E D.....      | .....      | .....      | .CN.NP     | .....L.D...NE |
| <i>Choloepus didactylus</i>          | .....S.....           | D.N...I..  | .A..S....  | .CNASNP    | .FF.....      |
| <i>Anas platyrhynchos</i>            | .DK.S...P ..YS...V..  | .....      | .....      | T.CKTTAPFD | .MV.....S     |
| <i>Gallus gallus</i>                 | .DR.S...P ..YS...SVM  | .S.....    | .....      | V.CKATEPFD | ..V.....      |

|                                      | 160             | 170              | 180         | 190              | 200              |
|--------------------------------------|-----------------|------------------|-------------|------------------|------------------|
| <i>Odocoileus virginianus</i> (*)    | IMENSRDYNR      | RLWAWEGWRA       | EVGKQLRPLY  | EEYVVLEENEM      | ARANNYEDYG       |
| <i>Capreolus Capreolus</i>           | .....S.         | .....            | .....       | .....            | ...X.....        |
| <i>Cervus elaphus</i>                | .....           | .....            | .....       | .....            | .....            |
| <i>Muntiacus muntjak</i>             | .....           | .....            | .....       | .....            | .....            |
| <i>Oryx dammah</i> (*)               | .....           | .....            | .....       | .....            | .....            |
| <i>Nanger dama</i> (*)               | -----           | -----            | -----       | -----            | -----            |
| <i>Bubalus bubalis</i> (*)           | .....           | .....            | .....       | .....            | .....            |
| <i>Bos taurus</i> (*)                | .....           | .....            | .....       | .....            | .....            |
| <i>Balaenoptera musculus</i> (*)     | .....E.....     | .....            | .....F..... | .....            | .....            |
| <i>Tursiops truncatus</i> (*)        | .....K.....     | .....            | .....       | .....            | .....            |
| <i>Sus scrofa</i> (.)                | .....K..S.....  | .....S.....      | .....       | .....            | .....            |
| <i>Manis pentadactyla</i> (*)        | ...S.K..E.....  | .....S.....      | .....       | .....K.....      | .....H.....      |
| <i>Felis catus</i> (*)               | .....K..E.....  | .....            | .....       | .....A.K.....    | .....            |
| <i>Mustela putorius</i>              | .....K..E.....  | .....S.....      | .....       | .....A.K.....    | .....            |
| <i>Neogale vison</i>                 | .....K..E.....  | .....S.....      | .....       | .....A.K.....    | .....            |
| <i>Canis lupus</i> (.)               | .....K..E.....  | .....S.....      | .....       | .....A.K.....    | .....            |
| <i>Nyctereutes procyonoides</i> (*)  | .....K..E.....  | .....S.....      | .....       | .....A.K.....    | .....            |
| <i>Rhinolophus ferrumequinum</i>     | ...T.K..E.....  | .....            | .....       | .....K.....      | .....GYH.....    |
| <i>Rousettus aegyptiacus</i>         | ...S.K..SQ..... | .....S..S.....   | .....Y..... | .....K.....      | .....GE.....     |
| <i>Homo sapiens</i> (*)              | ..A..L..E.....  | .....S..S.....   | .....       | .....K.....      | .....H.....      |
| <i>Ptilocolobus tephrosceles</i> (*) | ...K.L..E.....  | .....S.....      | .....       | .....K.....      | .....H.K.....    |
| <i>Macaca mulatta</i> (*)            | ...K.L..E.....  | .....S.....      | .....       | .....K.....      | .....G..H.K..... |
| <i>Macaca nemestrina</i> (*)         | ...K.L..E.....  | .....S.....      | .....       | .....K.....      | .....H.K.....    |
| <i>Choloepus didactylus</i>          | .....DE.....    | .....S.....      | .....L..... | .....K.....      | .....            |
| <i>Anas platyrhynchos</i>            | ..A..I..HE..... | .....D..RMM..... | .....       | .....D.K..A..... | ..KL.G.A.....    |
| <i>Gallus gallus</i>                 | ..A..I..HE..... | .....D..RMM..... | .....       | .....E.K..A..... | ..L...S.....     |

|                                      | 210         | 220          | 230        | 240         | 250        |
|--------------------------------------|-------------|--------------|------------|-------------|------------|
| <i>Odocoileus virginianus</i> (*)    | DYWRGDYEVT  | EAGDYDYSRD   | QLMKDVENTF | AEIKPLYEQL  | HAYVRAKLMD |
| <i>Capreolus Capreolus</i>           | .....       | .....        | .....H..   | .....       | .....      |
| <i>Cervus elaphus</i>                | .....       | .....        | .....H..   | .....       | .....      |
| <i>Muntiacus muntjak</i>             | .....       | .....        | .....H..   | .....       | .....      |
| <i>Oryx dammah</i> (*)               | .....       | G.....       | .....R..   | .....       | .....      |
| <i>Nanger dama</i> (*)               | -----       | -----        | -----      | -----       | -----      |
| <i>Bubalus bubalis</i> (*)           | .....       | G.....       | .....H..   | .....       | .....H     |
| <i>Bos taurus</i> (*)                | .....       | G.....       | .....R..   | .....       | .....H     |
| <i>Balaenoptera musculus</i> (*)     | .....       | G..V....N    | ..IA...R.. | .....       | .....      |
| <i>Tursiops truncatus</i> (*)        | .....       | G.....       | ..IR...R.. | .....       | .....      |
| <i>Sus scrofa</i> (.)                | .....       | GT.....N     | ..E...R..  | .....H.     | .....      |
| <i>Manis pentadactyla</i> (*)        | .....TE     | G..NG..N...  | H..IE...HI | TQ.....H.   | .....      |
| <i>Felis catus</i> (*)               | .....EE     | WTDG..N...S  | ..I...H..  | TQ.....QH.  | .....      |
| <i>Mustela putorius</i>              | .....EE     | W..DG..S...N | ..IE...H.. | TQ.....H.   | .....      |
| <i>Neogale vison</i>                 | .....EE     | W..DG..N...N | ..IE...H.. | TQ.....H.   | .....      |
| <i>Canis lupus</i> (.)               | .....EE     | WENG..N...N  | ..ID...L.. | TQ..M...QH. | .....T.... |
| <i>Nyctereutes procyonoides</i> (*)  | .....EE     | WENG..N...N  | ..ID...H.. | TQ..M...QH. | .....T.... |
| <i>Rhinolophus ferrumequinum</i>     | ....R...TE  | GSP..LE....  | ..I...RI.  | .....       | .....T.... |
| <i>Rousettus aegyptiacus</i>         | .....TE     | GINGSA..T..  | ..IE...DRI | T.....      | .....T.... |
| <i>Homo sapiens</i> (*)              | .....N      | GVDG.....G   | ..IE...H.. | E.....H.    | .....N     |
| <i>Ptilocolobus tephrosceles</i> (*) | .....AN     | GVDG...N..   | ..IE...H.. | E.....H.    | .....N     |
| <i>Macaca mulatta</i> (*)            | .....N      | GVDG..NN..   | ..IE...R.. | E.....H.    | .....N     |
| <i>Macaca nemestrina</i> (*)         | .....N      | GVDG...N..   | ..IE...R.. | E.....H.    | .....N     |
| <i>Choloepus didactylus</i>          | .....TE     | GENG..A..N.S | ..I...H..  | E.....H.    | .....T..T. |
| <i>Anas platyrhynchos</i>            | ....AN...AD | YP EE..K.... | ..IQ...K.. | EQ.....Q..  | .....HR.EQ |
| <i>Gallus gallus</i>                 | ....AN...TD | YP EE..K.... | ..VQ...K.. | EQ.....QH.  | .....HR.EQ |

|                                      | 260         | 270        | 280         | 290        | 300         |
|--------------------------------------|-------------|------------|-------------|------------|-------------|
| <i>Odocoileus virginianus</i> (*)    | TY-PSYISPT  | GCLPAHLLGD | MWGREFWTNLY | SLTVPFKHKP | SIDVTEKMKN  |
| <i>Capreolus Capreolus</i>           | ..-.....    | .....X     | .....       | .....      | .....E.     |
| <i>Cervus elaphus</i>                | ..-.....    | .....      | .....       | .....      | .....E.     |
| <i>Muntiacus muntjak</i>             | A.-.....    | .....      | .....       | .....      | .....I...E. |
| <i>Oryx dammah</i> (*)               | ..-.....    | .....      | .....       | .....E.    | .....       |
| <i>Nanger dama</i> (*)               | -----       | -----      | -----       | -----      | -----       |
| <i>Bubalus bubalis</i> (*)           | ..-.....    | .....      | .....       | .....E.    | .....E.     |
| <i>Bos taurus</i> (*)                | ..-.....    | .....      | .....       | .....E.    | .....E.     |
| <i>Balaenoptera musculus</i> (*)     | A.-..R....  | .....      | .....       | P.....GE.  | .....KE.Q.  |
| <i>Tursiops truncatus</i> (*)        | A.-..R....  | .....      | .....       | P.....GER. | .....KE.Q.  |
| <i>Sus scrofa</i> (.)                | A.-..R....  | .....      | .....       | P.....GE.  | .....A.V.   |
| <i>Manis pentadactyla</i> (*)        | N.-..H....  | .....      | .....       | P.....RQ.  | N.....DA.V. |
| <i>Felis catus</i> (*)               | ..-..R....  | .....      | .....       | P.....GQ.  | N.....DA.V. |
| <i>Mustela putorius</i>              | A.-..R....  | .....      | .....       | P.M...RQ.  | N.....DA.V. |
| <i>Neogale vison</i>                 | A.-..R....  | .....      | .....       | P.M...GQ.  | N.....DA.V. |
| <i>Canis lupus</i> (.)               | ..-.....    | .....      | .....       | P.....GQ.  | N.....NA.V. |
| <i>Nyctereutes procyonoides</i> (*)  | ..-.....    | .....      | .....       | P.....GQ.  | N.....NA.V. |
| <i>Rhinolophus ferrumequinum</i>     | ..-..FH.... | .....      | .....       | P.....GQ.  | N.....DA.L. |
| <i>Rousettus aegyptiacus</i>         | A.-..H....  | .....      | I....       | P.....EQ.  | N.....DE.V. |
| <i>Homo sapiens</i> (*)              | A.-.....I   | .....      | .....       | .....GQ.   | N.....DA.VD |
| <i>Ptilocolobus tephrosceles</i> (*) | A.-.....    | .....      | .....       | .....GQ.   | N.....DA.V. |
| <i>Macaca mulatta</i> (*)            | A.-.....    | .....      | .....       | .....GQ.   | N.....DA.V. |
| <i>Macaca nemestrina</i> (*)         | A.-.....    | .....      | .....       | .....GQ.   | N.....DA.V. |
| <i>Choloepus didactylus</i>          | F.-..H....  | .....      | .....       | .....E.    | N.....DE.VR |
| <i>Anas platyrhynchos</i>            | A.GSQF..S.  | .....      | .....       | P.....YPA. | N.....DA.VQ |
| <i>Gallus gallus</i>                 | V.GSEL.N..  | .....      | .....       | N.....YPE. | N.....SA.AQ |

|                                      | 310        | 320        | 330        | 340        | 350        |
|--------------------------------------|------------|------------|------------|------------|------------|
| <i>Odocoileus virginianus</i> (*)    | QSWDAERIFK | EAEKFFVSIS | LPHMTQGFWD | NSMLTEPGDG | RKVVCHPTAW |
| <i>Capreolus Capreolus</i>           | .....      | .....      | .....      | .....      | .....      |
| <i>Cervus elaphus</i>                | .....      | G          | .....      | .....      | .....      |
| <i>Muntiacus muntjak</i>             | .....R     | .....      | .....      | .....      | .....      |
| <i>Oryx dammah</i> (*)               | .....      | .....      | Y          | .....      | .....      |
| <i>Nanger dama</i> (*)               | -.....     | .....      | Y          | E          | .....      |
| <i>Bubalus bubalis</i> (*)           | .....      | .....      | Y          | .....      | .....      |
| <i>Bos taurus</i> (*)                | .....      | .....      | Y          | .....      | .....      |
| <i>Balaenoptera musculus</i> (*)     | .....K     | G          | N          | E          | V          |
| <i>Tursiops truncatus</i> (*)        | .....K     | G          | N          | .....      | .....      |
| <i>Sus scrofa</i> (.)                | .....I     | E          | G          | N          | N          |
| <i>Manis pentadactyla</i> (*)        | T          | N          | VG         | K          | T          |
| <i>Felis catus</i> (*)               | .....R     | VG         | N          | E          | S          |
| <i>Mustela putorius</i>              | .....R     | E          | T          | VG         | N          |
| <i>Neogale vison</i>                 | .....R     | VG         | N          | E          | Q          |
| <i>Canis lupus</i> (.)               | .....RK    | VG         | N          | E          | G          |
| <i>Nyctereutes procyonoides</i> (*)  | .....RK    | VG         | N          | E          | S          |
| <i>Rhinolophus ferrumequinum</i>     | N          | K          | .....      | G          | N          |
| <i>Rousettus aegyptiacus</i>         | N          | N          | K          | .....      | LG         |
| <i>Homo sapiens</i> (*)              | A          | Q          | .....      | VG         | N          |
| <i>Ptilocolobus tephrosceles</i> (*) | A          | N          | Q          | .....      | VG         |
| <i>Macaca mulatta</i> (*)            | A          | N          | Q          | .....      | VG         |
| <i>Macaca nemestrina</i> (*)         | A          | N          | Q          | .....      | VG         |
| <i>Choloepus didactylus</i>          | A          | K          | .....      | VG         | K          |
| <i>Anas platyrhynchos</i>            | KN         | VK         | A          | A          | S          |
| <i>Gallus gallus</i>                 | KN         | MK         | T          | A          | A          |

|                                      | 360    | 370  | 380    | 390 | 400    |      |      |      |    |      |      |    |
|--------------------------------------|--------|------|--------|-----|--------|------|------|------|----|------|------|----|
| <i>Odocoileus virginianus</i> (*)    | DLGKGD | ERIK | MCTKVT | DDF | LTAHHE | MCHI | QYDM | AYAA | QP | YLIR | DGAN | EG |
| <i>Capreolus Capreolus</i>           | .      | .    | .      | .   | .      | .    | .    | .    | .  | .    | N    | .  |
| <i>Cervus elaphus</i>                | .      | .    | .      | .   | .      | .    | .    | .    | .  | .    | N    | .  |
| <i>Muntiacus muntjak</i>             | .      | .    | .      | .   | .      | .    | .    | .    | .  | .    | N    | .  |
| <i>Oryx dammah</i> (*)               | .      | .    | .      | .   | .      | .    | .    | .    | .  | .    | N    | .  |
| <i>Nanger dama</i> (*)               | .      | .    | .      | .   | .      | .    | .    | .    | .  | .    | N    | .  |
| <i>Bubalus bubalis</i> (*)           | .      | .    | .      | .   | .      | .    | .    | .    | .  | .    | N    | .  |
| <i>Bos taurus</i> (*)                | .      | .    | .      | .   | .      | .    | .    | .    | .  | .    | N    | .  |
| <i>Balaenoptera musculus</i> (*)     | .      | .    | .      | .   | .      | .    | .    | .    | T  | F    | N    | .  |
| <i>Tursiops truncatus</i> (*)        | .      | .    | .      | .   | .      | .    | .    | .    | T  | F    | N    | .  |
| <i>Sus scrofa</i> (.)                | .      | .    | .      | .   | .      | .    | .    | .    | I  | .    | N    | .  |
| <i>Manis pentadactyla</i> (*)        | .      | H    | .      | .   | .      | .    | .    | .    | M  | .    | N    | .  |
| <i>Felis catus</i> (*)               | .      | .    | .      | .   | .      | .    | .    | .    | V  | F    | N    | .  |
| <i>Mustela putorius</i>              | .      | R    | .      | .   | .      | .    | .    | .    | E  | F    | N    | .  |
| <i>Neogale vison</i>                 | .      | H    | .      | .   | .      | .    | .    | .    | .  | F    | N    | .  |
| <i>Canis lupus</i> (.)               | .      | .    | .      | .   | .      | .    | .    | .    | .  | F    | N    | .  |
| <i>Nyctereutes procyonoides</i> (*)  | .      | R    | .      | .   | .      | .    | .    | .    | .  | F    | N    | .  |
| <i>Rhinolophus ferrumequinum</i>     | .      | .    | .      | .   | E      | .    | .    | .    | S  | .    | N    | .  |
| <i>Rousettus aegyptiacus</i>         | .      | .    | .      | .   | .      | .    | .    | .    | .  | .    | .    | .  |
| <i>Homo sapiens</i> (*)              | .      | .    | I      | .   | K      | E    | .    | Y    | T  | .    | .    | .  |
| <i>Ptilocolobus tephrosceles</i> (*) | .      | .    | L      | .   | .      | .    | .    | .    | .  | F    | N    | .  |
| <i>Macaca mulatta</i> (*)            | .      | .    | L      | .   | .      | .    | .    | .    | .  | F    | S    | .  |
| <i>Macaca nemestrina</i> (*)         | .      | .    | I      | .   | .      | .    | .    | .    | .  | F    | N    | .  |
| <i>Choloepus didactylus</i>          | .      | .    | I      | .   | .      | .    | .    | .    | .  | F    | N    | .  |
| <i>Anas platyrhynchos</i>            | M      | N    | Y      | .   | .      | .    | .    | E    | SQ | F    | G    | .  |
| <i>Gallus gallus</i>                 | M      | N    | Y      | .   | .      | .    | .    | E    | SV | F    | .    | .  |



|                                      | 410         | 420         | 430         | 440         | 450         |
|--------------------------------------|-------------|-------------|-------------|-------------|-------------|
|                                      | ..... ..... | ..... ..... | ..... ..... | ..... ..... | ..... ..... |
| <i>Odocoileus virginianus</i> (*)    | FHEAVGEIMS  | LSAATPHYLK  | ALGLLEPDFY  | EDNETEINFL  | LKQALTIVGT  |
| <i>Capreolus Capreolus</i>           | .....       | .....       | .....       | .....       | .....       |
| <i>Cervus elaphus</i>                | .....       | .....       | .....       | .....       | .....       |
| <i>Muntiacus muntjak</i>             | .....       | .....       | .....       | .....       | .....       |
| <i>Oryx dammah</i> (*)               | .....       | .....       | A.....      | .....       | .....       |
| <i>Nanger dama</i> (*)               | .....       | .....       | A.....      | .....       | .....       |
| <i>Bubalus bubalis</i> (*)           | .....       | .....       | A...H       | .....       | .....       |
| <i>Bos taurus</i> (*)                | .....       | .....       | A...H       | .....       | .....       |
| <i>Balaenoptera musculus</i> (*)     | .....       | .....       | P.....      | V.....      | Q.....      |
| <i>Tursiops truncatus</i> (*)        | .....       | .....       | P.....      | SA.....     | .....       |
| <i>Sus scrofa</i> (.)                | .....       | .....       | P.....      | S.....      | .....       |
| <i>Manis pentadactyla</i> (*)        | .....       | KH..NI..    | P.....      | .....       | .....       |
| <i>Felis catus</i> (*)               | .....       | NH..TI..    | S.G.S       | S.....      | .....       |
| <i>Mustela putorius</i>              | .....       | NH..NI..    | P..S        | S..D        | .....       |
| <i>Neogale vison</i>                 | .....       | NH..NI..    | P..S        | S..D        | .....       |
| <i>Canis lupus</i> (.)               | .....       | NH..NI..    | P.S.F       | S.....      | .....       |
| <i>Nyctereutes procyonoides</i> (*)  | .....       | NH..NI..    | P.S.F       | S.....      | .....       |
| <i>Rhinolophus ferrumequinum</i>     | .....V..    | ..V..KH..   | TM...SS..L  | .....F..... | ..N.....    |
| <i>Rousettus aegyptiacus</i>         | .....VI..   | ..V..NH..   | NM...P..... | .....       | ..NV.....   |
| <i>Homo sapiens</i> (*)              | .....       | KH..SI..    | S...Q       | .....       | .....       |
| <i>Ptilocolobus tephrosceles</i> (*) | .....       | KH..SI..    | S...Q       | .....       | .....       |
| <i>Macaca mulatta</i> (*)            | .....       | KH..SI..    | S...Q       | .....       | .....       |
| <i>Macaca nemestrina</i> (*)         | .....       | KH..SI..    | S...Q       | .....       | .....       |
| <i>Choloepus didactylus</i>          | .....       | KH..I...P.. | Q..F.....   | .....       | .....       |
| <i>Anas platyrhynchos</i>            | .....       | EH..S.D...  | T.Q..E..... | .....       | .....       |
| <i>Gallus gallus</i>                 | .....       | QH..S.D...  | T.Q..E..... | .....       | .....       |

|                                      | 460        | 470        | 480            | 490          | 500         |
|--------------------------------------|------------|------------|----------------|--------------|-------------|
|                                      | .....      | .....      | .....          | .....        | .....       |
| <i>Odocoileus virginianus</i> (*)    | LPFTYMLEKW | RWMVFKGEIP | KEQWMEKWWE     | MKREIVGVVE   | PLPHDETYCD  |
| <i>Capreolus Capreolus</i>           | .....      | .....      | .....          | .....        | .....       |
| <i>Cervus elaphus</i>                | .....      | .....      | Q.....         | .....        | .....       |
| <i>Muntiacus muntjak</i>             | .....      | .....      | Q.....         | .....        | .....       |
| <i>Oryx dammah</i> (*)               | .....      | .....      | Q.....         | .....        | .....       |
| <i>Nanger dama</i> (*)               | .....      | .....      | Q.....         | .....        | .....       |
| <i>Bubalus bubalis</i> (*)           | .....      | .....      | Q.....         | .....        | .....       |
| <i>Bos taurus</i> (*)                | .....      | .....      | Q.....         | .....        | .....       |
| <i>Balaenoptera musculus</i> (*)     | .....      | .....      | Q.....         | .....        | .....       |
| <i>Tursiops truncatus</i> (*)        | .....      | .....      | Q.....         | .....        | .....       |
| <i>Sus scrofa</i> (.)                | .....      | .....      | Q.....         | .....        | .....       |
| <i>Manis pentadactyla</i> (*)        | .....      | S.Q.....   | K.....         | .....        | V.....      |
| <i>Felis catus</i> (*)               | .....      | .....      | Q.....         | .....        | V.....      |
| <i>Mustela putorius</i>              | .....      | .....      | Q.....         | D.....       | .....       |
| <i>Neogale vison</i>                 | .....      | .....      | Q.....         | D.....       | .....       |
| <i>Canis lupus</i> (.)               | .....      | .....      | D...KT...      | N.....       | V.....      |
| <i>Nyctereutes procyonoides</i> (*)  | .....      | .....      | D...KT...      | N.....       | V.....      |
| <i>Rhinolophus ferrumequinum</i>     | .....      | .....      | E...K.....     | K.....       | V.....      |
| <i>Rousettus aegyptiacus</i>         | .....      | .....      | .....          | L.....       | .....       |
| <i>Homo sapiens</i> (*)              | .....      | .....      | D...K.....     | .....        | V.....      |
| <i>Ptilocolobus tephrosceles</i> (*) | .....      | E.....     | D...K.....     | .....        | V.....      |
| <i>Macaca mulatta</i> (*)            | .....      | .....      | D...K.....     | .....        | V.....      |
| <i>Macaca nemestrina</i> (*)         | .....      | .....      | D...K.....     | .....        | V.....      |
| <i>Choloepus didactylus</i>          | .....      | R.....     | TK.....        | Q.....M..... | V....S..... |
| <i>Anas platyrhynchos</i>            | M.....     | R...T..... | QE.TKQ.....    | D.....       | V.....      |
| <i>Gallus gallus</i>                 | M.....     | N...T..... | QE.TKR..K..... | .....        | V.....      |

|                                      | 510        | 520        | 530        | 540        | 550        |
|--------------------------------------|------------|------------|------------|------------|------------|
|                                      | .....      | .....      | .....      | .....      | .....      |
| <i>Odocoileus virginianus</i> (*)    | PACLFHVAED | YSFIRYYTRT | IYQFQFHEAL | CKTANHEGAL | FKCDISNSTE |
| <i>Capreolus Capreolus</i>           | .....      | .....      | .....      | .....      | .....      |
| <i>Cervus elaphus</i>                | .....      | .....      | .....      | K.....     | .....      |
| <i>Muntiacus muntjak</i>             | .....      | .....      | .....      | .....      | .....      |
| <i>Oryx dammah</i> (*)               | .....      | .....      | .....      | K.....     | .....      |
| <i>Nanger dama</i> (*)               | .....      | .....      | .....      | K.....     | .....      |
| <i>Bubalus bubalis</i> (*)           | .....      | .....      | .....      | K.....     | .....      |
| <i>Bos taurus</i> (*)                | .....      | .....      | .....      | K.....     | .....      |
| <i>Balaenoptera musculus</i> (*)     | .....      | .....      | .....      | Q..K...P.  | Y.....     |
| <i>Tursiops truncatus</i> (*)        | .....      | .....      | .....      | Q..K...P.  | Y.....     |
| <i>Sus scrofa</i> (.)                | .....      | .....      | .....      | R..K...P.  | Y.....     |
| <i>Manis pentadactyla</i> (*)        | ..S....N.  | .....      | .....Q...  | Q..K...P.  | H.....     |
| <i>Felis catus</i> (*)               | ..S....N.  | .....      | .....Q...  | RI.K...P.  | H.....S.   |
| <i>Mustela putorius</i>              | ..A....N.  | .....      | .....Q...  | QI.K...P.  | Y.....S.   |
| <i>Neogale vison</i>                 | ..A....N.  | .....      | .....Q...  | QI.K...P.  | Y.....R.   |
| <i>Canis lupus</i> (.)               | ..S....N.  | .....      | .....Q...  | QI.K...P.  | H.....S.   |
| <i>Nyctereutes procyonoides</i> (*)  | ..S....N.  | .....      | .....Q...  | QI.K...P.  | H.....S.   |
| <i>Rhinolophus ferrumequinum</i>     | ..S....N.  | .....      | FE.....    | RI.K.D.P.  | H.....D    |
| <i>Rousettus aegyptiacus</i>         | ..S....N.  | .....      | FE...L...  | RI.Q...P.  | Y....A.... |
| <i>Homo sapiens</i> (*)              | ..S....SN. | .....      | L....Q...  | QA.K...P.  | H.....     |
| <i>Ptilocolobus tephrosceles</i> (*) | ..S....SN. | .....      | L....Q...  | QA.K...P.  | H.....     |
| <i>Macaca mulatta</i> (*)            | ..S....SN. | .....      | L....Q...  | QA.K...P.  | H.....     |
| <i>Macaca nemestrina</i> (*)         | ..S....SN. | .....      | L....Q...  | QA.K...P.  | H.....     |
| <i>Choloepus didactylus</i>          | ..T....N.  | .....      | .....Q...  | QA...Q.P.  | HR.....    |
| <i>Anas platyrhynchos</i>            | ..A....N.  | .....      | .....      | A...T.P.   | HT...T...A |
| <i>Gallus gallus</i>                 | ..A....N.  | .....      | .....Q...  | A...T.P.   | H...T...A  |

|                                      | 560        | 570           | 580        | 590         | 600         |
|--------------------------------------|------------|---------------|------------|-------------|-------------|
| <i>Odocoileus virginianus</i> (*)    | AGQRLIQMLS | L GKSE PWT LA | LESIVGIKTM | DVKPILLNYFE | PLFTWLKEQN  |
| <i>Capreolus Capreolus</i>           | .....      | .....         | .....      | .....       | .....       |
| <i>Cervus elaphus</i>                | .....      | .....         | .....      | .....       | .....       |
| <i>Muntiacus muntjak</i>             | .....      | .....         | .....      | .....       | .....       |
| <i>Oryx dammah</i> (*)               | .....R     | .....         | .....      | .....       | .....       |
| <i>Nanger dama</i> (*)               | .....R     | .....N        | .....      | .....       | .....       |
| <i>Bubalus bubalis</i> (*)           | .....R     | .....N        | .....      | .....       | .....       |
| <i>Bos taurus</i> (*)                | .....R     | .....N        | .....      | .....       | .....       |
| <i>Balaenoptera musculus</i> (*)     | .....H     | .....         | N...V...   | .....       | L.....      |
| <i>Tursiops truncatus</i> (*)        | .....H     | .....S        | R...V...   | .....       | L...G...    |
| <i>Sus scrofa</i> (.)                | ...K.....  | .....         | N...V...   | .....S...   | L...A...    |
| <i>Manis pentadactyla</i> (*)        | ...K.....  | ...K.....     | RV...T.N   | ...R.....   | L.....      |
| <i>Felis catus</i> (*)               | ..KK....T  | ...K.....     | HV...E.K   | N.T...K...  | .....       |
| <i>Mustela putorius</i>              | ...K.HE... | ...R.K...F    | RV...A...  | ...R.....   | .....       |
| <i>Neogale vison</i>                 | ...K.HE... | ...R.K...F    | RV...A...  | ...R.....   | .....       |
| <i>Canis lupus</i> (.)               | ...K...E.K | ...K...Y      | IV...A.N   | ...R.....   | .....       |
| <i>Nyctereutes procyonoides</i> (*)  | ...K...E.K | ...K...Y      | IV...A.N   | ...R.....   | .....       |
| <i>Rhinolophus ferrumequinum</i>     | ..EK.H.... | V...Q...SV    | KDF...S.N  | ...G...R... | ...Y...T... |
| <i>Rousettus aegyptiacus</i>         | ..KK.H.... | ...K.....     | ...A.T.N   | ...R.....   | .....K      |
| <i>sapiens</i> (*)                   | ...K.FN..R | .....         | NV...A.N   | N.R.....    | .....D      |
| <i>Ptilocolobus tephrosceles</i> (*) | ...K..N..K | .....         | NV...A.N   | N.R.....    | .....D      |
| <i>Macaca mulatta</i> (*)            | ...K..N..K | ...E.....     | NV...A.N   | N.R.....    | .....D      |
| <i>Macaca nemestrina</i> (*)         | ...K..N..K | .....         | NV...A.N   | N.R.....    | .....D      |
| <i>Choloepus didactylus</i>          | ...K..N..K | S.....A       | HV...T.H   | .....       | .....D      |
| <i>Anas platyrhynchos</i>            | ..GS.REL.K | ...R.K...Q    | ...LT.E.Y  | NAT...H...  | ...N..QKN   |
| <i>Gallus gallus</i>                 | ..GN.R.L.E | ...K...Q      | ...AT.E.Y  | NAT...H...  | ...N..QKN   |

|                                      | 610                         | 620                         | 630          | 640                 | 650                  |
|--------------------------------------|-----------------------------|-----------------------------|--------------|---------------------|----------------------|
| <i>Odocoileus virginianus</i> (*)    | RNSFV <b>GW</b> ST <b>E</b> | WTPYSD <b>Q</b> SI <b>K</b> | VRIS-----    | -----               | ---LKSALG-           |
| <i>Capreolus Capreolus</i>           | .....                       | ...XXXXXXXX                 | XXXXXXXXXXXX | XXX <b>Y</b> EWNDNE | MYL <b>F</b> R..SVAY |
| <i>Cervus elaphus</i>                | K.....                      | .....                       | ...LKSALG    | KNAYEWNDNE          | LYL <b>F</b> R..SVAY |
| <i>Muntiacus muntjak</i>             | .....                       | .....                       | ...LKSALG    | KNAYEWNDNE          | MYL <b>F</b> R..SVAY |
| <i>Oryx dammah</i> (*)               | .....                       | .....                       | ...LKSGLG    | KNAYEWNDNE          | MYL <b>F</b> R..SVAY |
| <i>Nanger dama</i> (*)               | .....                       | .....                       | ...LKSALG    | KNAYEWNDNE          | MYL <b>F</b> R..SVAY |
| <i>Bubalus bubalis</i> (*)           | .....                       | .....                       | ...LKAALG    | ENAYEWNDNE          | MYL <b>F</b> R..SVAY |
| <i>Bos taurus</i> (*)                | .....                       | .....                       | ...LKSALG    | ENAYEWNDNE          | MYL <b>F</b> Q..SVAY |
| <i>Balaenoptera musculus</i> (*)     | ...S.....D                  | .....                       | ...LKSALG    | EKAYEWNDNE          | MYL <b>F</b> R..SVAY |
| <i>Tursiops truncatus</i> (*)        | .....R.D                    | .....N....                  | ...LKSALG    | EKAYEWNDNE          | MYL <b>F</b> R..SVAY |
| <i>Sus scrofa</i> (.)                | G..S...N.D                  | ...A.....                   | ...LKSALG    | KEAYEWNDNE          | MYL <b>F</b> R..SIAY |
| <i>Manis pentadactyla</i> (*)        | K.....N.D                   | .S..AA....                  | ...LKSALG    | EKAYEWNDSE          | MYL <b>F</b> R..SVAY |
| <i>Felis catus</i> (*)               | .....N.D                    | .R..A.....                  | ...LKSALG    | DEAYEWNDNE          | MYL <b>F</b> R..SVAY |
| <i>Mustela putorius</i>              | .....N.D                    | .S..A.....                  | ...LKSALG    | EKAYEWNDNE          | MY <b>FF</b> Q..SIAY |
| <i>Neogale vison</i>                 | .....N.D                    | .S..A.....                  | ...LKSALG    | EKAYEWNDNE          | MY <b>FF</b> Q..SIAY |
| <i>Canis lupus</i> (.)               | .....N.D                    | .S..A.....                  | ...LKSALG    | EKAYEWNNNE          | MYL <b>F</b> R..SIAY |
| <i>Nyctereutes procyonoides</i> (*)  | .....N.D                    | .S..A.....                  | ...LKSALG    | EKAYEWNNNE          | MYL <b>F</b> R..SIAY |
| <i>Rhinolophus ferrumequinum</i>     | .K.....N.D                  | .S..A.....                  | ...LKSALG    | EKAYEWNNNE          | MYL <b>F</b> R..SVAY |
| <i>Rousettus aegyptiacus</i>         | .....D                      | .S...G....                  | ...LKAALG    | EKAYEWNDNE          | MYL <b>F</b> ..SIAY  |
| <i>sapiens</i> (*)                   | K.....D                     | .S..A.....                  | ...LKSALG    | DKAYEWNDNE          | MYL <b>F</b> R..SVAY |
| <i>Ptilocolobus tephrosceles</i> (*) | K.....D                     | .S..A.....                  | ...LKSALG    | DKAYEWNDNE          | MYL <b>F</b> R..SVAY |
| <i>Macaca mulatta</i> (*)            | K.....D                     | .S..A.....                  | ...LKSALG    | DKAYEWNDNE          | MYL <b>F</b> R..SVAY |
| <i>Macaca nemestrina</i> (*)         | K.....D                     | .S..A.....                  | ...LKSALG    | DKAYEWNDNE          | MYL <b>F</b> R..SVAY |
| <i>Choloepus didactylus</i>          | ..VP.....D                  | GS.DA..-..                  | ...LKSALG    | DKAYEWNDNE          | MYL <b>F</b> R..SVAY |
| <i>Anas platyrhynchos</i>            | SGRYI..N.D                  | ...ENA...                   | ...LKAAG-    | -QTYEWNKSE          | LFL <b>F</b> ..TIAY  |
| <i>Gallus gallus</i>                 | SGRSI..N.D                  | .....NA..                   | ...LKAALG    | DDAYVWDASE          | LFL <b>F</b> ..SIAY  |

|                                      | 660        | 670        | 680         | 690        | 700        |
|--------------------------------------|------------|------------|-------------|------------|------------|
| <i>Odocoileus virginianus</i> (*)    | -----      | -----      | ---KNADANC  | PFVWCVPPVS | HLVAIVIRSA |
| <i>Capreolus Capreolus</i>           | AMRKYFLGER | NETIPFGEEN | VWVSDKKPRI  | S.KFF.TS.N | NVSD..P.TE |
| <i>Cervus elaphus</i>                | AMRKYFLKKR | NETIPFGEEN | VWVSDKKPRI  | S.KFF.TSPN | NVSD.IP.TE |
| <i>Muntiacus muntjak</i>             | AMRKYFLKKR | NETIPFGEEN | VWVSDKKPRI  | S.KFF.TSPN | NVSD.IP.TE |
| <i>Oryx dammah</i> (*)               | AMRKYFFKDR | NETIPFGEEN | VWVSDKKPRI  | S.KFF.TSPN | NVSD.IP.TE |
| <i>Nanger dama</i> (*)               | AMRRYFFEAS | NETIPFGAEN | VWVSDKKPRI  | S.KFF.TSPN | NVSD.IP.TE |
| <i>Bubalus bubalis</i> (*)           | AMRKYFSEAR | NETVLFGEDN | VWVSDKKPRI  | S.KFF.TSPN | NVSD.IP.TE |
| <i>Bos taurus</i> (*)                | AMRKYFSEAR | NETVLFGEDN | VWVSDKKPRI  | S.KFF.TSPN | NVSD.IP.TE |
| <i>Balaenoptera musculus</i> (*)     | AMREYFSKVR | NETIPFGEKD | VWVSDLKPRI  | S.NFF.TTPK | NVSD.IS.TE |
| <i>Tursiops truncatus</i> (*)        | AMREYFSKVR | NKTIPFGEKD | VWVSDLKPRI  | S.NFF.TSPK | NMSD.IP.TE |
| <i>Sus scrofa</i> (.)                | AMRNYFSSAK | NETIPFGAED | VWVSDLKPRI  | S.NFF.TSPA | NMSD.IP..D |
| <i>Manis pentadactyla</i> (*)        | AMREYFSKFK | KQTIPFEES  | VRVSDLKPRV  | S.IFF.TLPK | NVS.VIP.AE |
| <i>Felis catus</i> (*)               | AMREYFSKVK | NQTIPFVEDN | VWVS.LKPRI  | S.NFF.TASK | NVSDVIP..E |
| <i>Mustela putorius</i>              | AMREYFSKVK | NQTIPFVGKD | VRVSDLKPRI  | S.NFI.TSPE | NMSD.IP.AD |
| <i>Neogale vison</i>                 | AMREYFSKVK | KQTIPFVDKD | VRVSDLKPRI  | S.NFI.TSPE | NMSD.IP.AD |
| <i>Canis lupus</i> (.)               | AMRQYFSEVK | NQTIPFVEDN | VWVSDLKPRI  | S.NFS.TSPG | NVSD.IP.TE |
| <i>Nyctereutes procyonoides</i> (*)  | AMRQYFSEVK | NQTIPFVEDN | VWVSDLKPRI  | S.NFF.TSPG | NVSD.IP.TE |
| <i>Rhinolophus ferrumequinum</i>     | AMREYFLKTK | NQTILFGEED | VWVS.LKPRI  | S.NFY.TSPR | N.SD.IP.PE |
| <i>Rousettus aegyptiacus</i>         | SLREYFLKVK | NLTIPFGEED | VWVSDLKPRI  | S.NFF.TSPQ | NVSEFIP.TE |
| <i>Homo sapiens</i> (*)              | AMRQYFLKVK | NQMILFGEED | VRVA.LKPRI  | S.NFF.TAPK | NVSD.IP.TE |
| <i>Ptilocolobus tephrosceles</i> (*) | AMRKYFLEIK | HQTILFGEED | VRVADLKPRI  | S.NFY.TAPK | NVSD.IP.TE |
| <i>Macaca mulatta</i> (*)            | AMRTYFLEIK | HQTILFGEED | VRVADLKPRI  | S.NFY.TAPK | NVSD.IP.TE |
| <i>Macaca nemestrina</i> (*)         | AMRTYFLEIK | HQTILFGEED | VRVADLKPRI  | S.NFY.TAPK | NVSD.IP.TE |
| <i>Choloepus didactylus</i>          | AMREYFLKVK | NQTILFGEED | VQVSEELKPRI | S.IFV.SAPN | NTSD.IP.TE |
| <i>Anas platyrhynchos</i>            | AMRTYFAQ-K | QQLIDFEATD | VHVSEETQRV  | S.YIT.SMPG | NASN..PKAD |
| <i>Gallus gallus</i>                 | AMRKYFAKEK | EQNVDFAQVT | IHVGEETQRV  | S.YLT.SMPG | NVSD..P.AD |

|                                      | 710        | 720        | 730         | 740        | 750        |
|--------------------------------------|------------|------------|-------------|------------|------------|
|                                      | .... ....  | .... ....  | .... ....   | .... ....  | .... ....  |
| <i>Odocoileus virginianus</i> (*)    | VT         |            |             |            | V          |
| <i>Capreolus Capreolus</i>           | .EEAIRLSRG | RINDAFQLDD | NSLEFLGIQP  | TLGPPYEPPV | TIWLIIFGV. |
| <i>Cervus elaphus</i>                | .ENAIRLSRY | RINDAFQLDD | NSLEFLGIQP  | TLGPPYKPPV | TIWLIIFGV. |
| <i>Muntiacus muntjak</i>             | .ENAIRLSRD | RINDAFQLDD | NSLEFLGIQP  | TLGPPYEPPV | TIWLIIFGV. |
| <i>Oryx dammah</i> (*)               | .ENAIRLSRD | RINDAFQLDD | NSLEFLGIQP  | TLGPPYEPPV | TIWLIIFGV. |
| <i>Nanger dama</i> (*)               | .ENAIRLSRD | RINDAFQLDD | NSLEFLGIQP  | TLGPPYEPPV | TIWLIIFGV. |
| <i>Bubalus bubalis</i> (*)           | .ENAIRLFRG | RINDVFQLDD | NSLEFLGIQP  | TLRPPYEPPV | TIWLIIFGV. |
| <i>Bos taurus</i> (*)                | .ENAIRLSRD | RFNDVFQLDD | NSLEFLGIQP  | TLGPPYEPPV | TIWLIIFGV. |
| <i>Balaenoptera musculus</i> (*)     | .EEAIRMSRG | RINDAFRLDD | NSLEFLGIQP  | TLGPPYEPPV | TIWLIIFGA. |
| <i>Tursiops truncatus</i> (*)        | .EEAIRMSRG | RINDAFRLDD | SSLEFLGVQP  | TLAPPYEPPV | TVWLIIFGV. |
| <i>Sus scrofa</i> (.)                | .EKAISMSRS | RINDAFRLDD | NTLEFLGIQP  | TLGPPDEPPV | TVWLIIFGV. |
| <i>Manis pentadactyla</i> (*)        | .EEAIRMSRS | RINDVFRLDD | NSLEFLGIQP  | TLEPPYQPPV | TIWLIVFGV. |
| <i>Felis catus</i> (*)               | .EEAIRMSRS | RINDAFRLDD | NSLEFLGIQP  | TLSPPYQPPV | TIWLIVFGV. |
| <i>Mustela putorius</i>              | .EEAIRKSRG | RINDAFRLDD | NSLEFLGIQP  | TLEPPYQPPV | TIWLIVFGV. |
| <i>Neogale vison</i>                 | .EEAIRKSRG | RINDAFRLDD | NSLEFLGIQP  | TLEPPYQPPV | TIWLIVFGV. |
| <i>Canis lupus</i> (.)               | .EEAIRMYRS | RINDVFRLDD | NSLEFLGIQP  | TPGPPYEPPV | TIWLIVFGV. |
| <i>Nyctereutes procyonoides</i> (*)  | .EEAIRMYRS | RINDVFRLDD | NSLEFLGIQP  | TLGPPYEPPV | TIWLIVFGV. |
| <i>Rhinolophus ferrumequinum</i>     | .EGAIRMSRS | RINDAFRLDD | NSLEFLGIQP  | TLGPPYQPPV | TIWLIVFGV. |
| <i>Rousettus aegyptiacus</i>         | .EGAIRMSRS | RINDAFRLDD | DTLEFLGIEP  | TLGTPYQPPV | TIWLIVFGV. |
| <i>Homo sapiens</i> (*)              | .EKAIRMSRS | RINDAFRLND | NSLEFLGIQP  | TLGPPNQPPV | SIWLIVFGV. |
| <i>Ptilocolobus tephrosceles</i> (*) | .EEAIRLSRS | RINDAFRLND | DSLEFLGIQP  | TLAPPYQPPV | TIWLIVFGV. |
| <i>Macaca mulatta</i> (*)            | .EEAIRISRS | RINDAFRLND | NSLEFLGIQT  | TLAPPYQSPV | TTWLIVFGV. |
| <i>Macaca nemestrina</i> (*)         | .EEAIRISRS | RINDAFRLND | NSLEFLGIQT  | TLAPPYQSPV | TTWLIVFGV. |
| <i>Choloepus didactylus</i>          | .EKAISMSRG | RINDAFRLDD | NTLEFVGIYP  | TLAPPYEPPV | VIWLVVFGVI |
| <i>Anas platyrhynchos</i>            | .ESAISMSRG | RINEAFGLDD | DTLEFVGIIIP | TLAAPYEPPV | TIWLIIFGV. |
| <i>Gallus gallus</i>                 | .EKAIRMSRG | RISEAFRLDD | NTLEFDGIVP  | TLATPYKPPV | TIWLILFGV. |

|                                      | 760        | 770        | 780        | 790        | 800        |
|--------------------------------------|------------|------------|------------|------------|------------|
| <i>Odocoileus virginianus</i> (*)    | SQCCVQATLV | LLNPGPK--- | -----VPEE- | -----      | -----      |
| <i>Capreolus Capreolus</i>           | MGVV.LGIV. | .IFT.IRDRR | KKNQASS..N | PYG-----   | SVDLNK--GE |
| <i>Cervus elaphus</i>                | MGVV.IGIV. | .IFT.IRDRR | KKNQASS..N | PYG-----   | SVDLNK--GE |
| <i>Muntiacus muntjak</i>             | MGVV.IGIV. | .IFT.IRDRR | KKNQVSS..N | PYG-----   | SVDLNK--GE |
| <i>Oryx dammah</i> (*)               | MGVV.IGIVG | .IFT.IRDQR | KKNQASS..N | PYG-----   | SVDLNK--GE |
| <i>Nanger dama</i> (*)               | MGVV.IGIV. | .IFT.IQDRR | KHDNDGLQND | ENLRVQQQAV | KVDIPR--NS |
| <i>Bubalus bubalis</i> (*)           | MGVV.IGII. | .IFT.IRDRR | KKNQASS..N | PYG-----   | SVDLNK--GE |
| <i>Bos taurus</i> (*)                | MGVV.IGIV. | .IFT.IRNRR | KKNQASS..N | PYG-----   | SVDLNK--GE |
| <i>Balaenoptera musculus</i> (*)     | MGVV.IGIA. | .IFT.IRDRR | EKSQASS..N | PYI-----   | SMDLSK--GE |
| <i>Tursiops truncatus</i> (*)        | MGVV.IGIV. | .IFT.IRDRR | KKNQASS..N | PYG-----   | SVGLSK--GE |
| <i>Sus scrofa</i> (.)                | MGLV.VGIV. | .IFT.IRDRR | KKKQASS..N | PYG-----   | SMDLSK--GE |
| <i>Manis pentadactyla</i> (*)        | MGVI.VGIV. | .IFT.IRDRK | KKNQARS.QN | PYA-----   | SVDLSK--GE |
| <i>Felis catus</i> (*)               | MGVV.VGIVL | .IVS.IRNRR | KNNQARS..N | PYA-----   | SVDLSK--GE |
| <i>Mustela putorius</i>              | MGVV.VGIFL | .IFS.IRNRR | KNNQARS..N | PYA-----   | SVDLSK--GE |
| <i>Neogale vison</i>                 | MGVV.VGIFL | .IFS.IRNRR | KNNQARS..N | PYA-----   | SVDLSK--GE |
| <i>Canis lupus</i> (.)               | MGVV.VGIVL | .IFS.IRNRR | KNDQARG..N | PYA-----   | SVDLSK--GE |
| <i>Nyctereutes procyonoides</i> (*)  | MGVV.VGIVL | .IFS.IRNRR | KNDQARG..N | PYA-----   | SVDLSK--GE |
| <i>Rhinolophus ferrumequinum</i>     | MAVV.VGIV. | .IIT.IRDRR | KKDQARS..N | PYS-----   | SVDLSK--GE |
| <i>Rousettus aegyptiacus</i>         | MGLV.VGIVL | .IFV.IRDRR | KKNQERS..N | PYS-----   | SVDLSK--GE |
| <i>Homo sapiens</i> (*)              | MGVI.VGIVI | .IFT.IRDRK | KKNKARSG.N | PYA-----   | SIDISK--GE |
| <i>Ptilocolobus tephrosceles</i> (*) | MGVI.AG.V. | .IFT.IRDRK | KKNQARS..N | PYA-----   | SIDISK--GE |
| <i>Macaca mulatta</i> (*)            | MGVI.AGIV. | .IFT.IRDRK | KKNQARS..N | PYA-----   | SIDINK--GE |
| <i>Macaca nemestrina</i> (*)         | MGVI.AGIV. | .IFT.IRDRK | KKNQARS..N | PYA-----   | SIDINK--GE |
| <i>Choloepus didactylus</i>          | MSVI.IGIVL | .IFT.IRERK | KNRQASGQ.N | PYA-----   | SVDLSK--GE |
| <i>Anas platyrhynchos</i>            | ISLV.IGVI. | .IVS.QDRK  | KKAKGRER.A | ESN-----C  | EVNPYDDDGR |
| <i>Gallus gallus</i>                 | MSLI.IGVI. | .IIT.QDRK  | KKARGRAN.A | GSN-----C  | EVNPYDEDGR |



*Odocoileus virginianus* (\*)  
*Capreolus Capreolus*  
*Cervus elaphus*  
*Muntiacus muntjak*  
*Oryx dammah* (\*)  
*Nanger dama* (\*)  
*Bubalus bubalis* (\*)  
*Bos taurus* (\*)  
*Balaenoptera musculus* (\*)  
*Tursiops truncatus* (\*)  
*Sus scrofa* (.)  
*Manis pentadactyla* (\*)  
*Felis catus* (\*)  
*Mustela putorius*  
*Neogale vison*  
*Canis lupus* (.)  
*Nyctereutes procyonoides* (\*)  
*Rhinolophus ferrumequinum*  
*Rousettus aegyptiacus* *Homo sapiens* (\*)  
*Ptilocolobus tephrosceles* (\*)  
*Macaca mulatta* (\*)  
*Macaca nemestrina* (\*)  
*Choloepus didactylus*  
*Anas platyrhynchos*  
*Gallus gallus*

.....|.....| .....|  
 -----|-----  
 NNSG**FQNTDD** VQTSL  
 NNSG**FQNTDD** VQTSL  
 NNSG**FQNTDD** VQTSL  
 NNSG**FQNTDD** VQTSL  
 LKATVP**FSNS** PE**KLK**  
 NNSG**FQNTDD** VQTSL  
 NNSG**FQNTDD** VQTSL  
 NNSG**FQNSGD** V**HTSF**  
 NN**PGFQNSDD** VQT**SE**  
 SNSG**FQNGDD** IQT**SE**  
 NN**PGFQNVDD** VQT**SE**  
 NN**PGFQ****HADD** VQT**SE**  
 NN**PGFQNVDD** VQT**SE**  
 NN**PGFQNVDD** VQT**SE**  
 NN**PGFQSGDD** VQT**SE**  
 NN**PGFQNVDD** AQT**SE**  
 NN**PGFQNGDD** VQT**SE**  
 NNAG**FQNNDD** VQT**SE**  
 NN**PGFQNTDD** VQT**SE**  
 NN**PGFQNTDD** VQT**SE**  
 NN**PGFQNTDD** VQT**SE**  
 NN**PGFQNSDD** IQT**SE**  
 SN**KGFELSDE** TQT**SE**  
 SN**KGF****EQSEE** TQT**SE**

**Figure S1.** Multiple sequence alignment of the full-length ACE2 protein sequences for the species characterized for the species characterized in [7] and additional deer species included from GenBank (GCA\_000751575.1, XP\_037678579.1, XP\_012949915.3, QEQ50331.1, KAB0345583.1, XP\_043752042.1, XP\_036696353.1). Alignments were performed using ClustalW Multiple Alignment in BioEdit version 7.2.5. The names of species with (\*) correspond to those with high or moderate susceptibility to SARS-CoV-2 while (.) correspond to species with low susceptibility to SARS-CoV-2. The positions highlighted in red boxes are considered as known binding residues and predictions of SARS-CoV-2 S-binding propensity [7]. Positions K31, E35, N53, M82, N90, N323 and K354 (this last two shifted one amino acid from [7]) are reported as binding hot spots residues. The high variability in the aligned sequences of ACE2 from position 600 is delimited with a green line.
